# Supplementary material for: Controlling the three-dimensional morphology of nanocrystals
Source: Royal Society of Chemistry journal article supplement (doi:10.1039/c0ce00264j), 2010-01-01
Supplement: c0ce00264j.pdf [file c0ce00264j.pdf]

## **Supplementary information for:**

### **Controlled Growth of Gold Nanoparticles with a Multitude of Morphologies.**

Hugo A. Day<sup>†</sup>, Dorota Bartczak<sup>†</sup>, Natasha Fairbairn<sup>†</sup>, Eva Mcguire<sup>‡</sup>, Mahmoud Ardakani<sup>‡</sup>, Alexandra E. Porter<sup>‡</sup>, Antonios G. Kanaras<sup>†\*</sup>

*<sup>†</sup>School of Physics and Astronomy, University of Southampton, Southampton SO17 1BJ, Hampshire, UK; <sup>‡</sup>Department of Materials, Imperial College London, Exhibition Road, London SW7 2AZ, UK*

#### Table of contents:

Figure S1. TEM tomography images.

Figure S2. UV-Visible spectrum of BSPP particles.

Figure S3. TEM and histogram of BSPP particles.

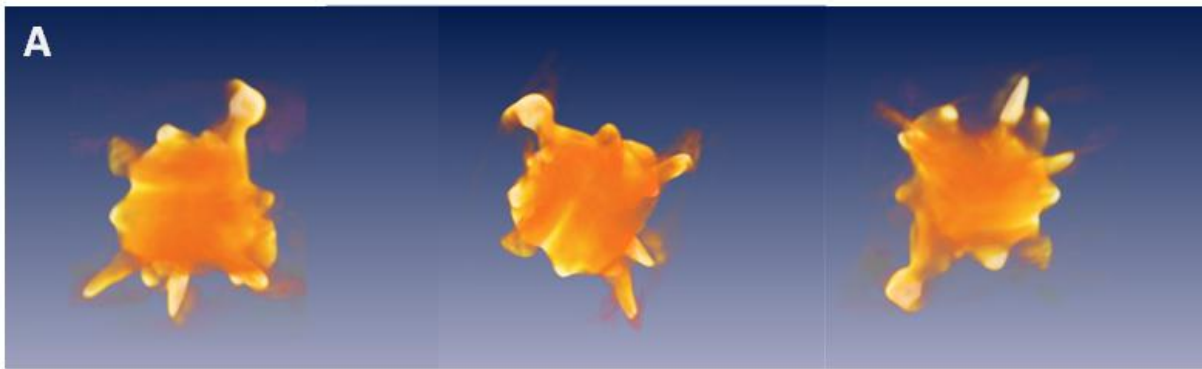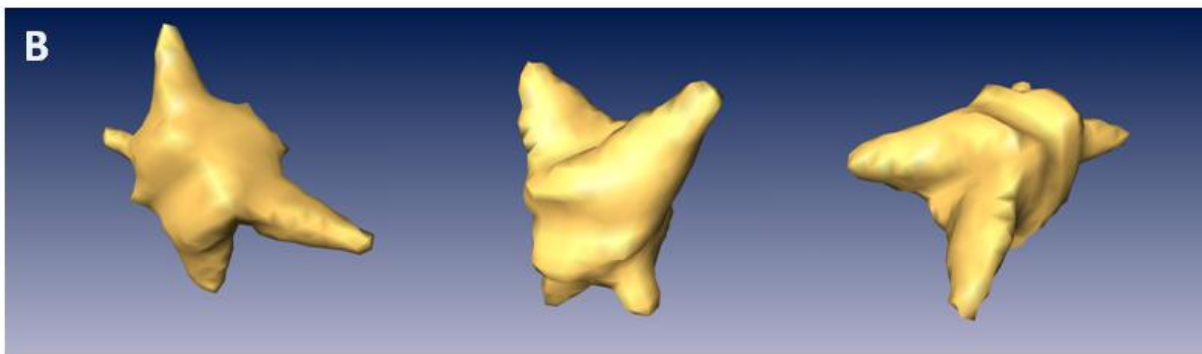

**Figure S1.** BfTEM tomography reconstructions of x and y samples. A) Voltex projection image of highly branched gold particles. B) Surface rendered iso-surface reconstruction of the less branched gold particles.

CHARACTERIZATION OF THE NANOPARTICLES USED AS SEEDS.

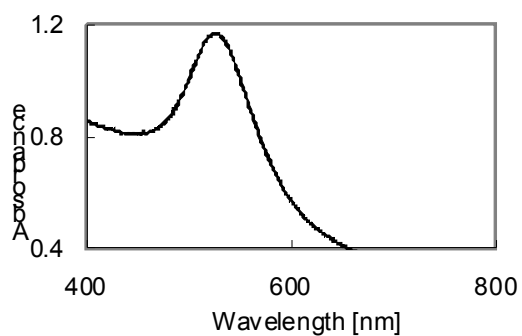

**Figure S2.** UV-visible spectrum of BSPP coated gold nanoparticles (seeds).

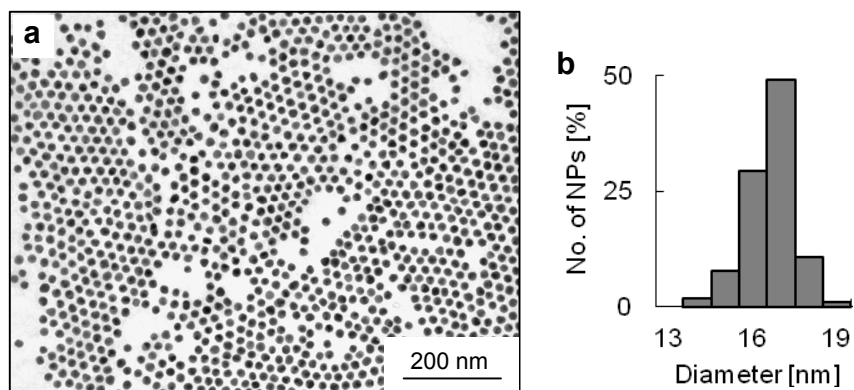

**Figure S3.** TEM image (a) and representing size distribution histogram (b) of BSPP coated gold nanoparticles (seeds).
